# Supplementary figures and images for: Основи комерційної діяльності: Навчальний посібник
Source: MDPI journal article supplement (doi:10.3390/ijms232112798), 2007-01-01

Figure S1

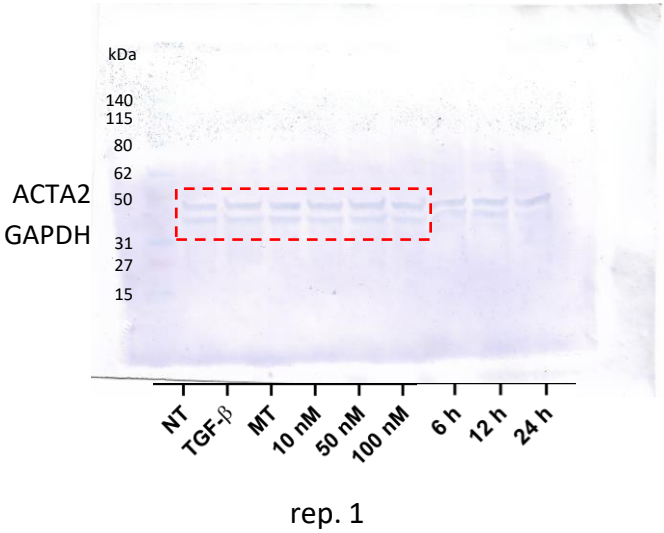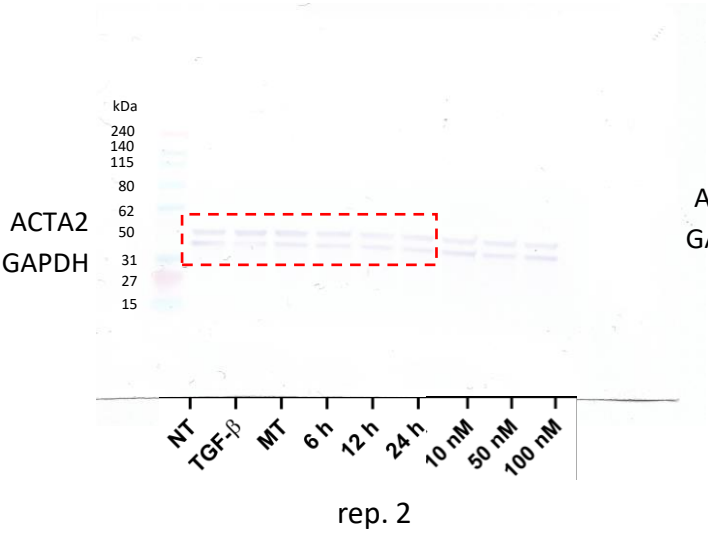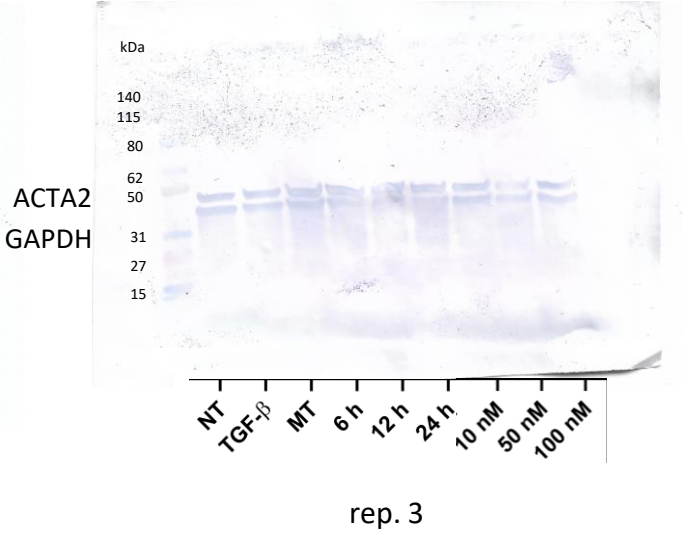

Figure S2

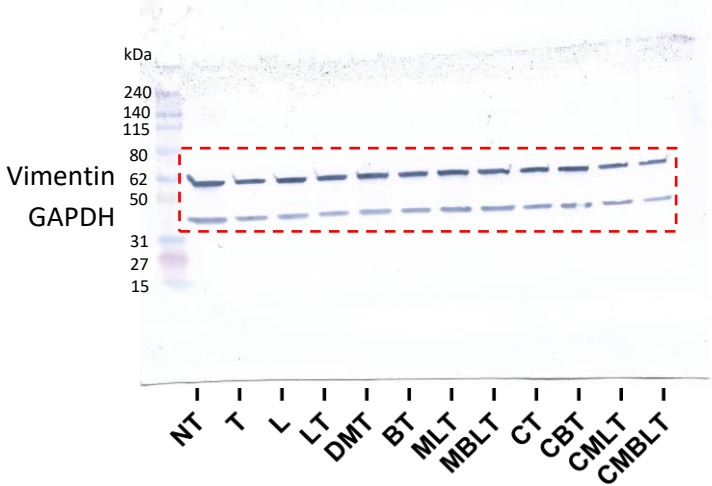

rep. 1

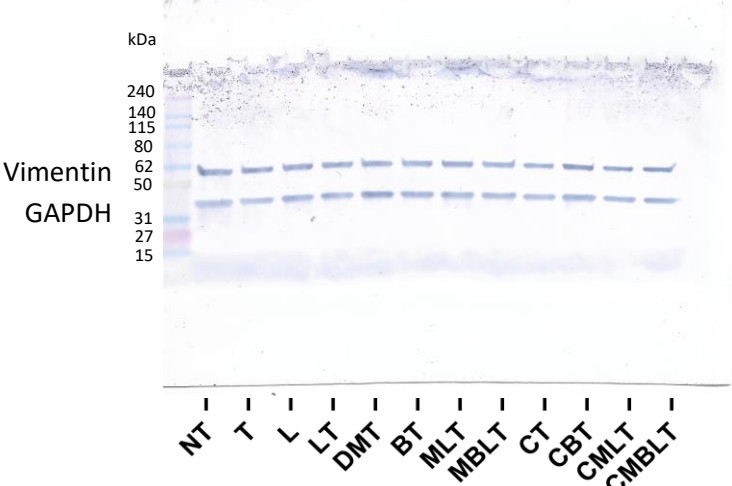

rep. 2

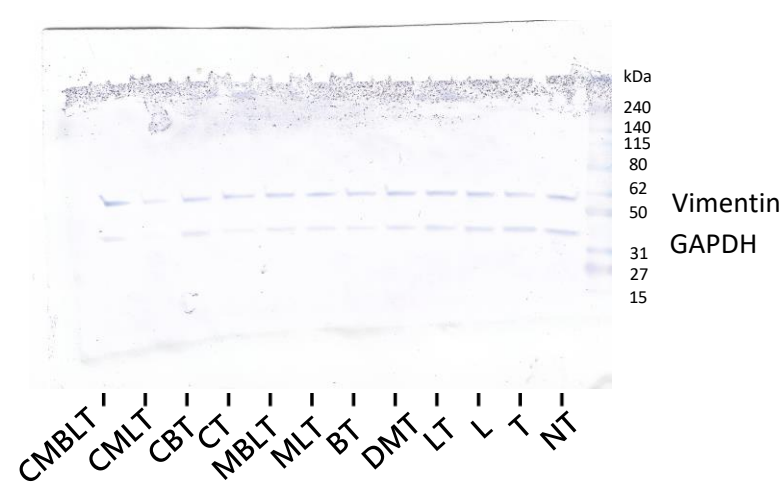

rep. 3

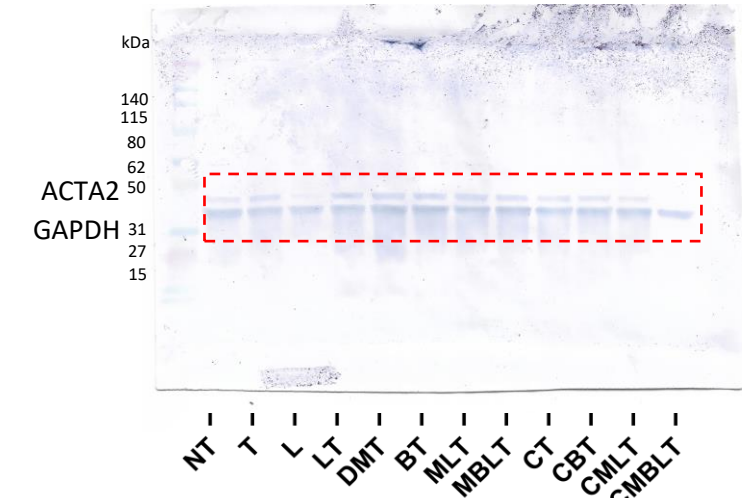

rep. 1

Figure S3

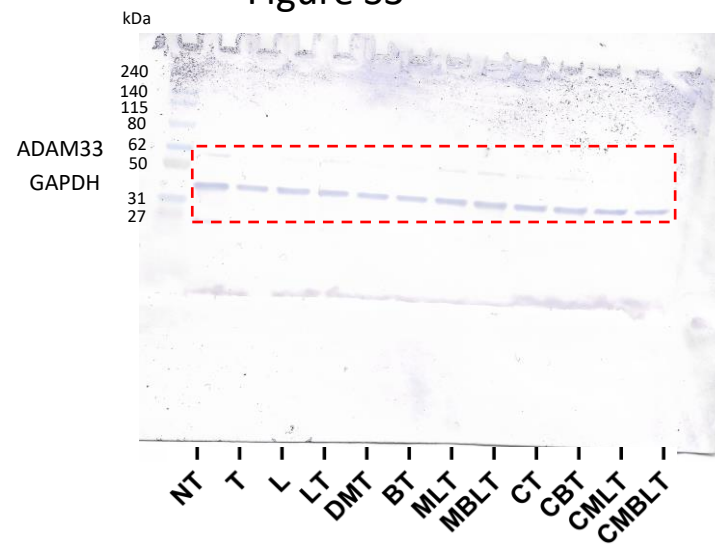

rep. 1

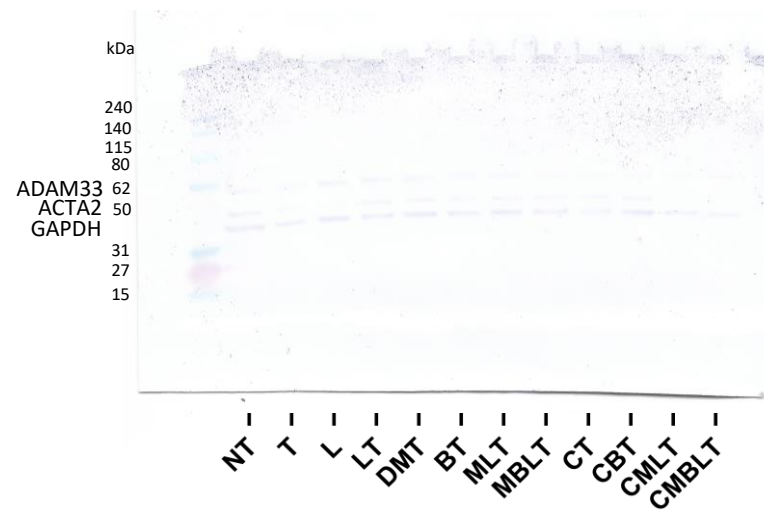

rep. 2

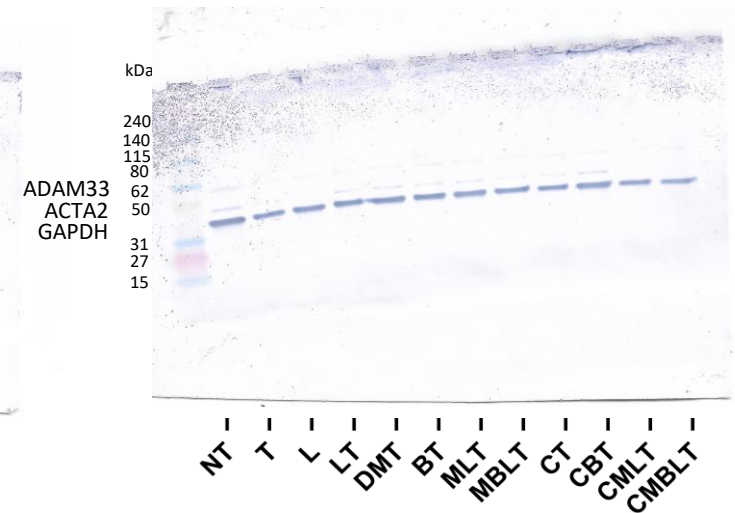

rep. 3

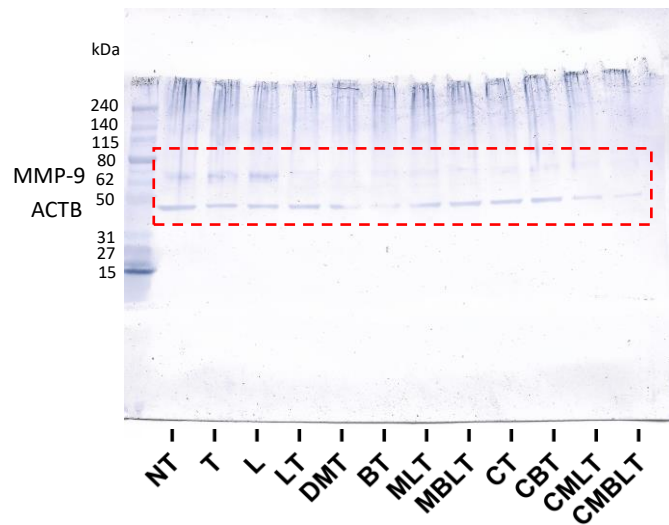

rep. 1

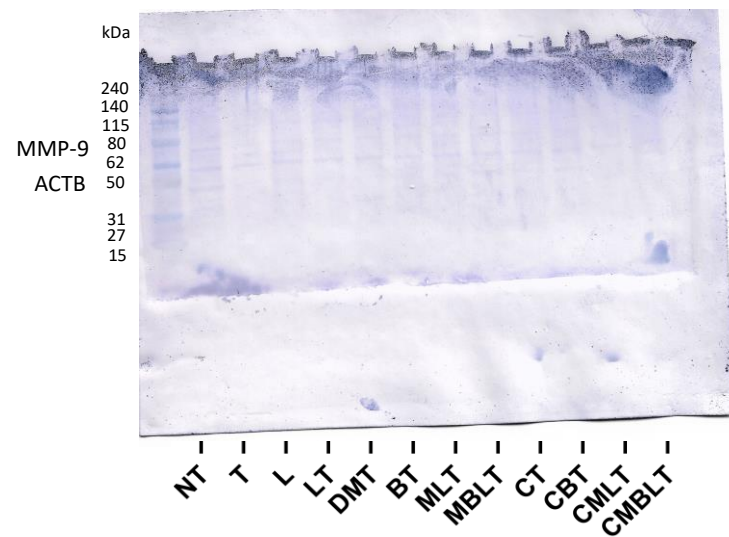

rep. 2

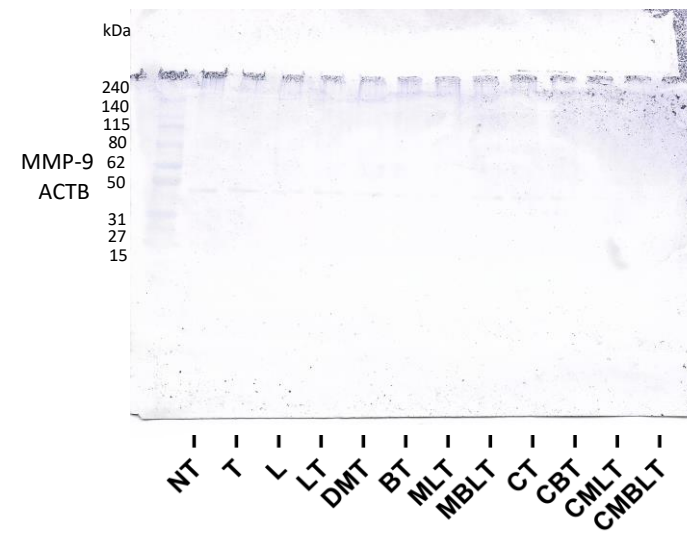

rep. 3

Supplement: s1 [file s1]
